# Supplementary material for: Zebularine, a DNA Methylation Inhibitor, Activates Anthocyanin Accumulation in Grapevine Cells
Source: MDPI journal article supplement (doi:10.3390/genes13071256), 2022-07-15
Supplement: s1 [file s1]

**Table S1: Genes related to the general phenylpropanoid pathway, the flavonoid biosynthetic pathways, and the anthocyanin specific pathway.**

| Name                                                                    | Enzymatic activity / transporter type                  | Gene number | References                                                | Gene IDs                                                                                                                                                                                                                        |
|-------------------------------------------------------------------------|--------------------------------------------------------|-------------|-----------------------------------------------------------|---------------------------------------------------------------------------------------------------------------------------------------------------------------------------------------------------------------------------------|
| <b>General phenylpropanoid biosynthetic genes</b>                       |                                                        |             |                                                           |                                                                                                                                                                                                                                 |
| PAL                                                                     | phenylalanine ammonia lyase                            | 15          | [6] <sup>3</sup>                                          | Vitvi00g01367; Vitvi06g00256; Vitvi08g01022; Vitvi13g00622; Vitvi11g00126; Vitvi11g00116; Vitvi16g00066; Vitvi16g01507; Vitvi16g01502; Vitvi16g00054; Vitvi16g00061; Vitvi16g01503; Vitvi16g00060; Vitvi16g00055; Vitvi16g00057 |
| C4H                                                                     | cinnamate-4-hydroxylase                                | 3           | [7] <sup>1</sup>                                          | Vitvi11g00924; Vitvi11g01045; <b>Vitvi06g00803</b>                                                                                                                                                                              |
| 4CL                                                                     | 4-coumarate-coA ligase                                 | 14          |                                                           | Vitvi01g01561; Vitvi02g00938; Vitvi06g01318; Vitvi08g01625; Vitvi11g01257; Vitvi11g01258; Vitvi13g00701; Vitvi14g01588; Vitvi14g01589; Vitvi16g00139; Vitvi17g00148; Vitvi18g00126; Vitvi18g00124; Vitvi01g01661                |
| <b>Flavonoid-related genes</b>                                          |                                                        |             |                                                           |                                                                                                                                                                                                                                 |
| CHS                                                                     | chalcone synthase                                      | 3           | [6] <sup>3</sup> ; [9] <sup>2</sup>                       | Vitvi14g01449; Vitvi14g01448; Vitvi05g01044                                                                                                                                                                                     |
| CHI                                                                     | chalcone isomerase                                     | 6           | [6] <sup>3</sup>                                          | Vitvi13g00225; Vitvi13g01911; Vitvi19g00009; Vitvi14g01683; Vitvi07g00128; Vitvi04g00175                                                                                                                                        |
| F3'5'H                                                                  | flavonoid 3',5'-hydroxylase                            | 5           | [11] <sup>1</sup> ; [17] <sup>2</sup>                     | Vitvi06g01192; Vitvi06g01888; <b>Vitvi06g01885</b> ; Vitvi06g01206; Vitvi08g01637                                                                                                                                               |
| F3'H                                                                    | flavonoid 3'-hydroxylase                               | 2           | [11] <sup>1</sup> ; [17] <sup>2</sup>                     | Vitvi17g00698; <b>Vitvi17g00700</b>                                                                                                                                                                                             |
| F3H                                                                     | flavanone-3-hydroxylase                                | 2           | [6] <sup>3</sup>                                          | Vitvi04g01454; Vitvi18g01119                                                                                                                                                                                                    |
| DFR                                                                     | dihydroflavanol reductase                              | 1           | [6] <sup>3</sup> ; [13] <sup>1</sup>                      | <b>Vitvi18g00988</b>                                                                                                                                                                                                            |
| LDOX                                                                    | Leucoanthocyanidin dioxygenase                         | 1           | [6] <sup>3</sup>                                          | Vitvi02g00435                                                                                                                                                                                                                   |
| <b>Genes specific for anthocyanin biosynthesis</b>                      |                                                        |             |                                                           |                                                                                                                                                                                                                                 |
| UGT                                                                     | UDP Glc:flavonoid 3-O-glucosyltransferase              | 1           | [6] <sup>3</sup> ; [8] <sup>1</sup>                       | <b>Vitvi16g00156</b>                                                                                                                                                                                                            |
| AOMT                                                                    | Anthocyanin O-methyltransferase                        | 4           | [16] <sup>1</sup> ; [18] <sup>1</sup> ; [19] <sup>1</sup> | <b>Vitvi01g02265</b> ; <b>Vitvi01g02263</b> ; Vitvi01g01635; Vitvi01g02261                                                                                                                                                      |
| AT                                                                      | Acyltransferases                                       | 2           | [23] <sup>1</sup>                                         | <b>Vitvi03g01816</b> ; Vitvi03g00077                                                                                                                                                                                            |
| <b>Genes involved in the transport of anthocyanins into the vacuole</b> |                                                        |             |                                                           |                                                                                                                                                                                                                                 |
| GST                                                                     | glutathione S-transferase                              | 5           | [14] <sup>1</sup> ; [24] <sup>1</sup>                     | Vitvi19g01328; Vitvi19g02197; Vitvi19g01338; Vitvi04g00880; Vitvi04g00884                                                                                                                                                       |
| AM                                                                      | Transporters<br>(Multidrug And Toxic Extrusion family) | 3           | [15] <sup>1</sup> ; [20] <sup>1</sup> ; [22] <sup>3</sup> | <b>Vitvi16g01911</b> ; <b>Vitvi16g01915</b> ; Vitvi16g01913                                                                                                                                                                     |
| ABCC                                                                    | Transporters (ATP binding cassette protein)            | 1           | [21] <sup>1</sup>                                         | <b>Vitvi16g01210</b>                                                                                                                                                                                                            |

For each enzyme or transporter, the genes were selected according to the bibliography (see references mentioned in the table), and completed with a search for the closest paralogous genes, using Ensembl Plant (<https://plants.ensembl.org/index.html>), with identity percentage between the two genes > 50%, except for CHS genes and genes specifically related to anthocyanin biosynthesis and transport, for which only genes with identity percentage >75% were selected).

<sup>1</sup>: functional characterization (the gene which were characterized are in bold letters); <sup>2</sup>: analysis of the gene family; <sup>3</sup>: cloning.

**Table S2: genes identified as regulators of anthocyanin, proanthocyanidin, or flavonol biosynthesis**

| Name     | Biosynthetic pathways                            | Activity  | Gene ID       | Target genes                             | References                         |
|----------|--------------------------------------------------|-----------|---------------|------------------------------------------|------------------------------------|
| MYBA1    | Anthocyanins                                     | Activator | Vitvi02g01019 | CHI3, F3'5'H, UFGT, 3AT, GST4, OMT       | [23]; [27]; [30]; [31]; [33]; [34] |
| MYBA2    | Anthocyanins                                     | Activator | Vitvi02g01015 | UFGT                                     | [26]; [28]; [29]                   |
| MYBA5    | Anthocyanins                                     | Activator | Vitvi14g00940 | UFGT, 3AT                                | [33]                               |
| MYBA6    | Anthocyanins                                     | Activator | Vitvi14g00930 | UFGT, 3AT                                | [33]                               |
| MYBA7    | Anthocyanins                                     | Activator | Vitvi14g00925 | UFGT, 3AT                                | [33]                               |
| MYBC2-L1 | anthocyanins + proanthocyanidins                 | Repressor | Vitvi01g00401 | UFGT, GST4, OMT                          | [32], [34]                         |
| MYBPA1   | Early flavonoid and proanthocyanidins            | Activator | Vitvi15g00938 | CHS3, CHI, F3'5'H, LAR1, LAR2, LDOX, ANR | [26]; [28]; [29]; [31]; [33]       |
| MYBPA2   | proanthocyanidins                                | Activator | Vitvi11g00099 | F3'5'H, LAR1, LAR2, ANR                  | [31]                               |
| MYBPAR   | proanthocyanidins                                | Activator | Vitvi11g00097 | F3'5'H, LAR1, LAR2, ANR                  | [31]                               |
| MYBF1    | Early flavonoid biosynthetic pathway + flavonols | Activator | Vitvi07g00393 | CHI, FLS1                                | [28]                               |
| MYB13    | Stilbenes                                        | Activator | Vitvi05g01732 |                                          |                                    |
| MYB14    | Stilbenes                                        | Activator | Vitvi07g00598 | STS29, STS41                             | [88]                               |
| MYB15    | Stibenens                                        | Activator | Vitvi05g01733 | STS29, STS41                             | [88]                               |

Only references presenting experimental demonstration of the identity of the direct target genes are included.

| RT-qPCR |           |                            |
|---------|-----------|----------------------------|
| Gene    | Primer    | 5'-3' sequence             |
| VvEF1   | EF1-F     | CAAGAGAAACCATCCCTAGCTG     |
|         | EF1-R     | TCAATCTGTCTAGGAAAGGAAG     |
| VvMYBA1 | VvMYBA1-F | AAGCCATCATCCACTTCACC       |
|         | VvMYBA1-R | TCTCTCCAGAAGCCGAAAAG       |
| VvMYBA2 | VvMYBA2-F | AGACTCGATGAAGAGCTTAGG      |
|         | VvMYBA2-R | CTTTAGGCATCTATTCAACC       |
| VvMYC1  | MYC-F     | GGAAGTAAAGAGGGCAATAAA      |
|         | MYC-R     | CTACAAACATCAGCAACAATACCATA |
| VvCHI   | CHI-F     | AGGAGTTAGCGGATTCGGTTGAC    |
|         | CHI-R     | AAGGCAACACAATTCTCTGACACC   |

| McrBC-qPCR            |                |                           |
|-----------------------|----------------|---------------------------|
| Targeted sequence     | Primer         | 5'-3' sequence            |
| prActin               | VvprActin-F1   | TCTCACTAGCTCACTCAACC      |
|                       | VvprActin-R2   | CAGCCGACTCTGATAACTCC      |
| retrotransposon GRET1 | VvGret1LTR1-F1 | AGCAAGTCTTACACGCTATCAC    |
|                       | VvGret1LTR1-R1 | TAGAATGATCGTGGGAAGTGAC    |
| retrotransposon GRET1 | VvGret1LTR1-F2 | GACAACAAGTCACTTCCCAC      |
|                       | VvGret1LTR1-R2 | ATGATGACATTCGGAGGCAG      |
| retrotransposon CACTA | VvCACTA-F1     | TGTTGTCACTACTTATTCCTGGTC  |
|                       | VvCACTA-R1     | CGTCCCATAAGTCATTCAACTC    |
| retrotransposon CACTA | VvCACTA-F2     | AAACTTCGATAACGTACACCC     |
|                       | VvCACTA-R2     | CCACATGCTGTATGAAATTGAC    |
| prUFGT                | VvprUFGT-F3    | AAACAGTTATCAAACAGACCT     |
|                       | VvprUFGT-R3    | TTTCGTCATTTTCATCTTGG      |
| prMYBA2               | VvprMYBA2-F3   | AAATTCTAGTTGTAAGACTGTAGAC |
|                       | VvprMYBA2-R5   | AAGAAATAACAACCTCTCACGG    |

Table S3: list of the primers used for RT-qPCR and McrBC-PCR

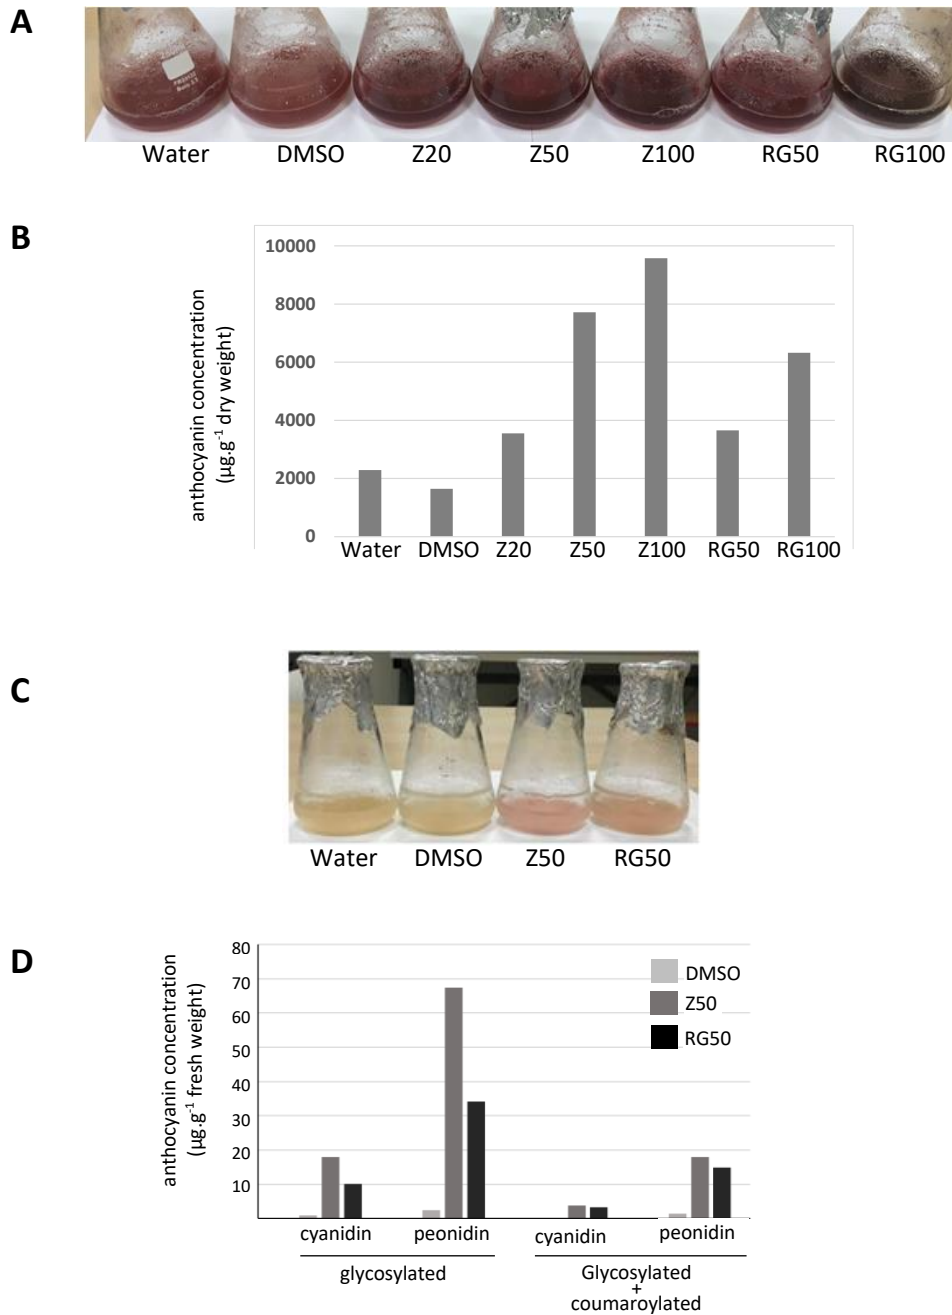

**Figure S1: Two DNA methyltransferase inhibitors—RG108 and zebularine - stimulate anthocyanin biosynthesis in grape cell cultures.** Treatments with zebularine and RG108 were performed 3 days after sub-culturing. The MS medium was supplemented with zebularine, RG108 or DMSO, which was used as a solvent for zebularine and RG108. An additional control with water was included. The experiment was performed in the light (**A, B**) with zebularine 20 µM (Z20), 50 µM (Z50) or 100 µM (Z100) and RG108 50µM (RG50) or 100µM (RG100), and in the dark (**C, D**), with zebularine 50µM (Z50) and RG108 50µM (RG50). Ten days after sub-culturing, cell suspensions were photographed (**A, C**) and harvested for anthocyanin quantification (**B, D**). The concentration of individual anthocyanin was determined as described in the Material and methods. In B, cell total anthocyanin content was calculated as the sum of each individual anthocyanin. This experiment was performed only once, therefore no statistical analysis is available

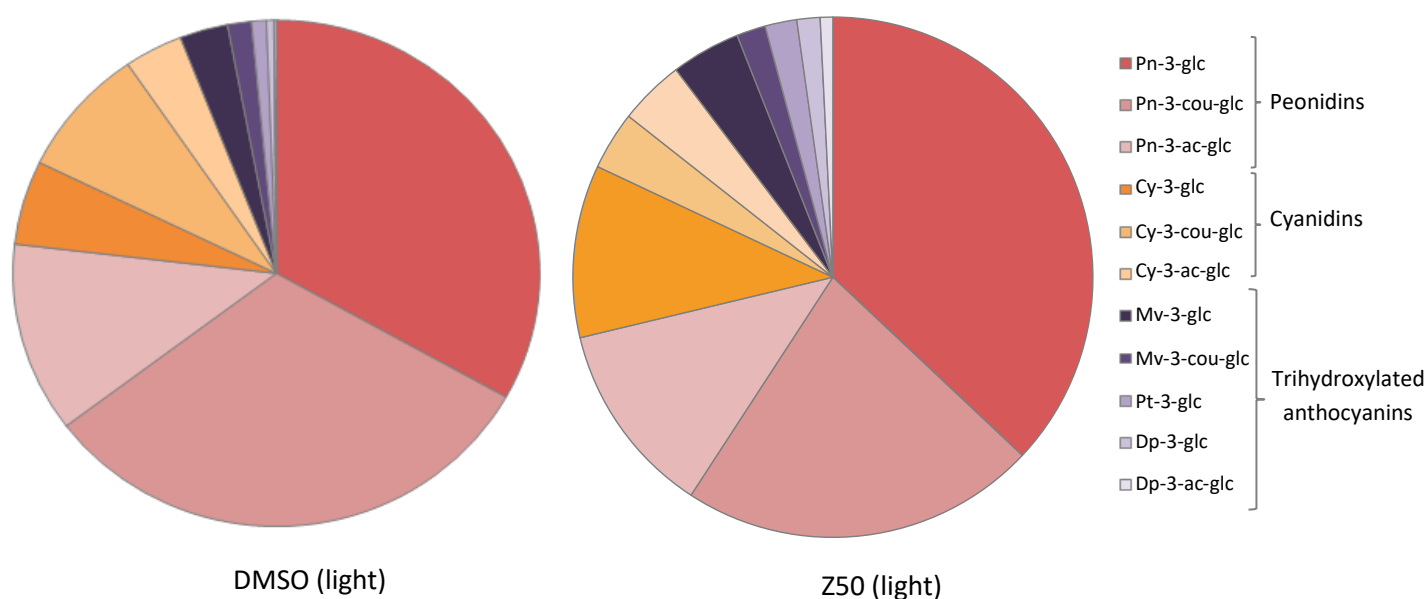

**Figure S2. Zebularine does not significantly affect anthocyanin composition.** The two chart pies represent the proportions of the different anthocyanins in light grown GT cells 12 days after subculture, in control conditions (DMSO) and after a treatment with zebularine 50 $\mu$ M (Z50). The concentration of individual anthocyanin was determined in three independent biological replicates, and the proportion of each individual anthocyanin was calculated using the mean of the concentrations of the three replicates. Pn-3-glc, peonidin-3-glucoside; Pn-3-cou-glc, peonidin-3-(6''-*p-coumaroyl-glucoside*); Pn-3-ac-glc, peonidin-3-(6''-acetylglucoside); Cy-glc, cyanidin-3-glucoside; Cy-3-cou-glc, cyanidin-3-(6''-*p-coumaroyl-glucoside*); Cy-3-ac-glc, cyanidin-3-(6''-acetylglucoside); Mv-3-glc, malvidin-3-glucoside; Mv-3-cou-glc, malvidin-3-(6''-*p-coumaroyl-glucoside*); Pt-3-glc, petunidin-3-glucoside; Dp-3-glc, delphinidin-3-glucoside; Dp-3-ac-glc, delphinidin-3-(6''-acetylglucoside).

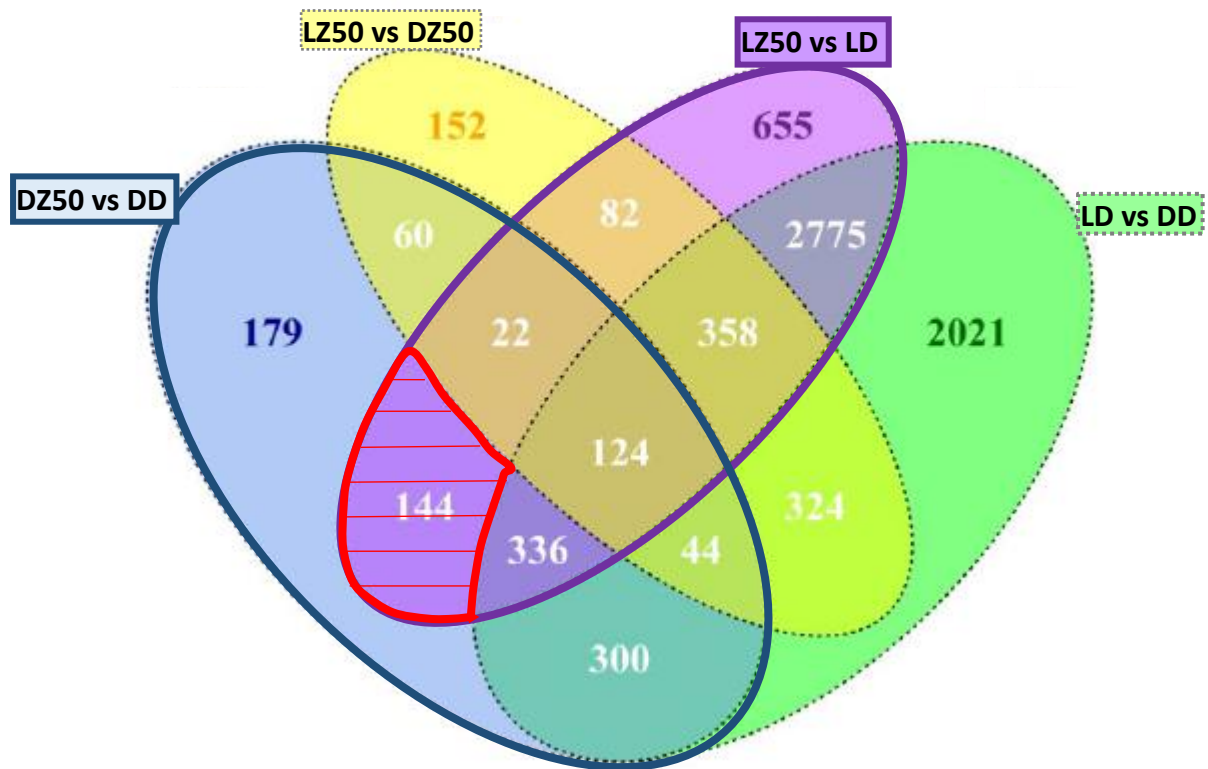

**Figure S3: Only 144 genes were specifically identified as zebularine-dependent DEGs.** Venn diagram displaying the number of DEGs identified for each pairwise comparison. The number of DEGs commonly identified in 2 different pairwise comparisons are indicated. The 144 genes which were identified as DEGs when comparing control and zebularine-treated cells both in light and dark, and in no other comparison are indicated by a red shape.

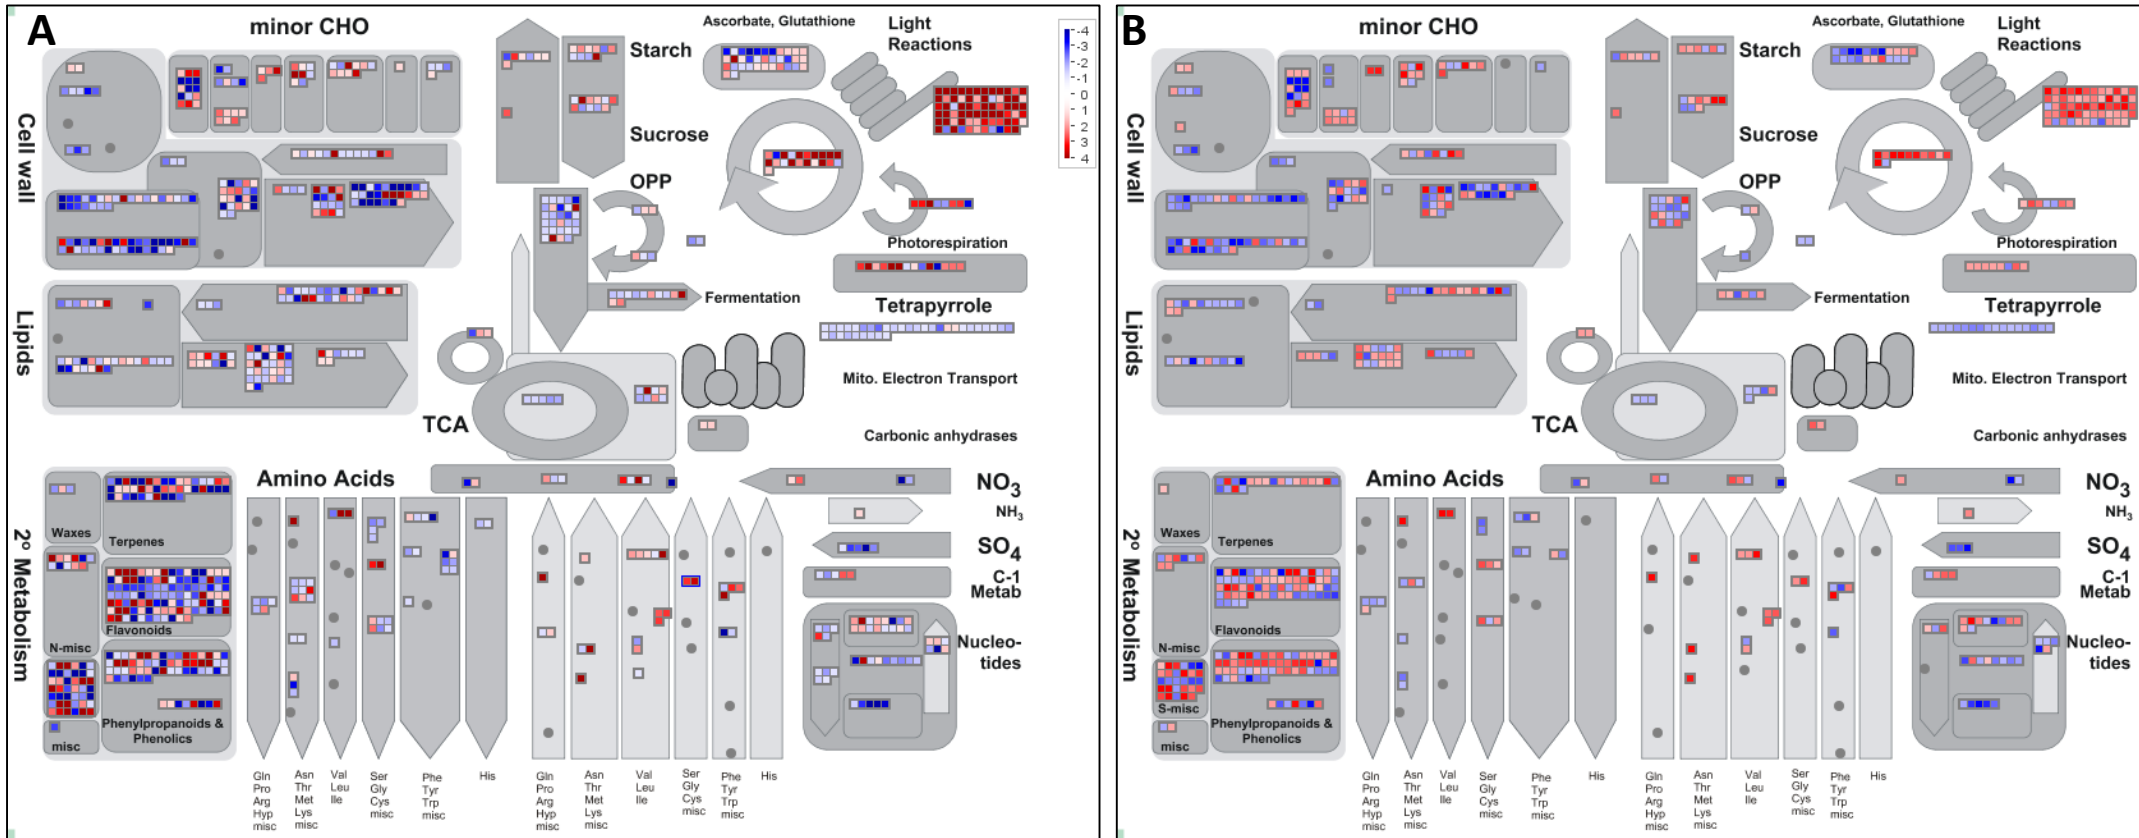

**Figure S4. MapMan analyses revealed a high similarity between the genes which were deregulated by light in the control cells and the genes which were deregulated by zebrarline in the light.** Overviews of differences in expression of genes involved in primary and secondary metabolisms. Heat maps show genes with statistically significant (P value < 0.05) differential expression identified by comparing LD to DD cells (A) and LD to LZ50 cells (B). A conventional red-to-blue scale was used to indicate up-regulation (red) or down-regulation (blue) by light. Hence in A, red boxes indicate genes which are up-regulated in LD compared to DD, whereas in B, they indicate genes which are up-regulated in LD compared to LZ50.

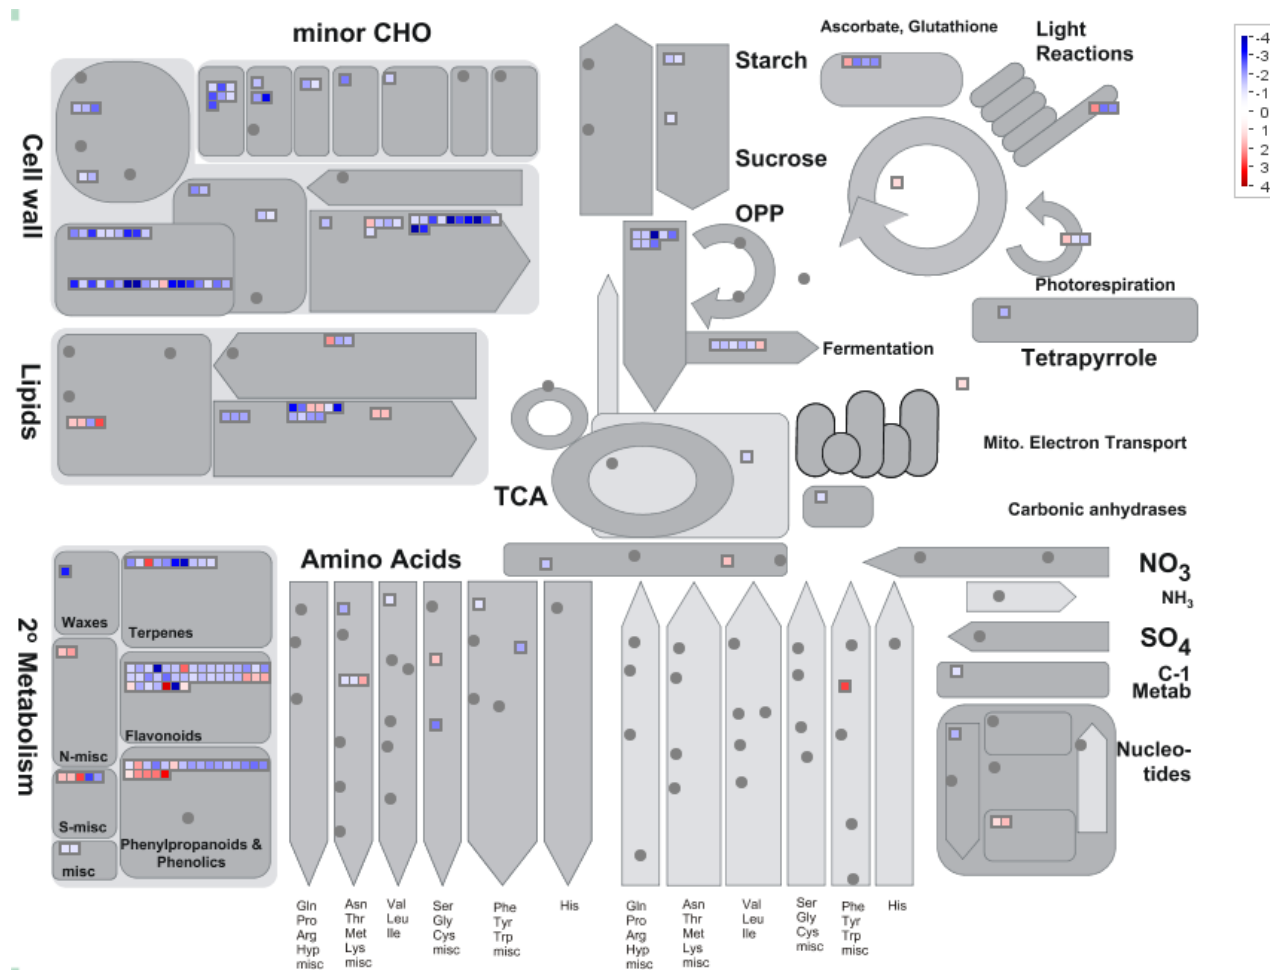

**Figure S5. A MAPMAN analysis revealed a global transcriptional repression of metabolism-related genes by zebularine in the dark.** Overview of differences in expression of genes involved in primary and secondary metabolisms. Heat maps show genes with statistically significant (P value < 0.05) differential expression identified by comparing DZ50 to DD cells. A conventional red-to-blue scale was used to indicate up-regulation (red) or down-regulation (blue) by zebularine. Hence red boxes indicate genes which are up-regulated in DZ50 compared to DD.



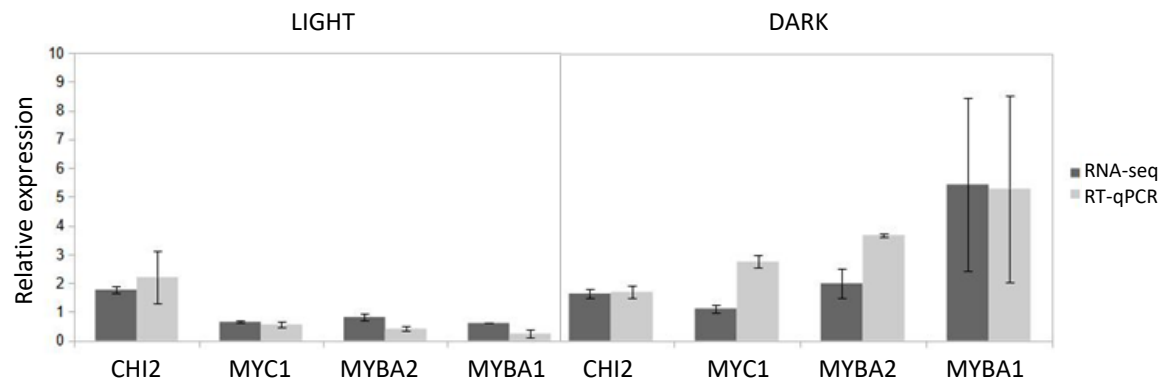

**Figure S6:** Comparison of RNA-seq and RT-qPCR expression data for 4 different genes, CHI (Vitvi13g00225), MYC1 (Vitvi07g00139), MYBA2 (Vitvi02g01015) and MYBA1 (Vitvi02g01019). For each gene the expression in zebularine treated cells (50μM) was expressed comparatively to the expression in DMSO treated cells. The relative expression was calculated for each of the 3 biological replicates, and the mean of the three relative expression values was reported on the graph. Error bars indicate standard deviation (SD) for the three replicates. For RT-qPCR quantification, EF1α was used as a reference gene.

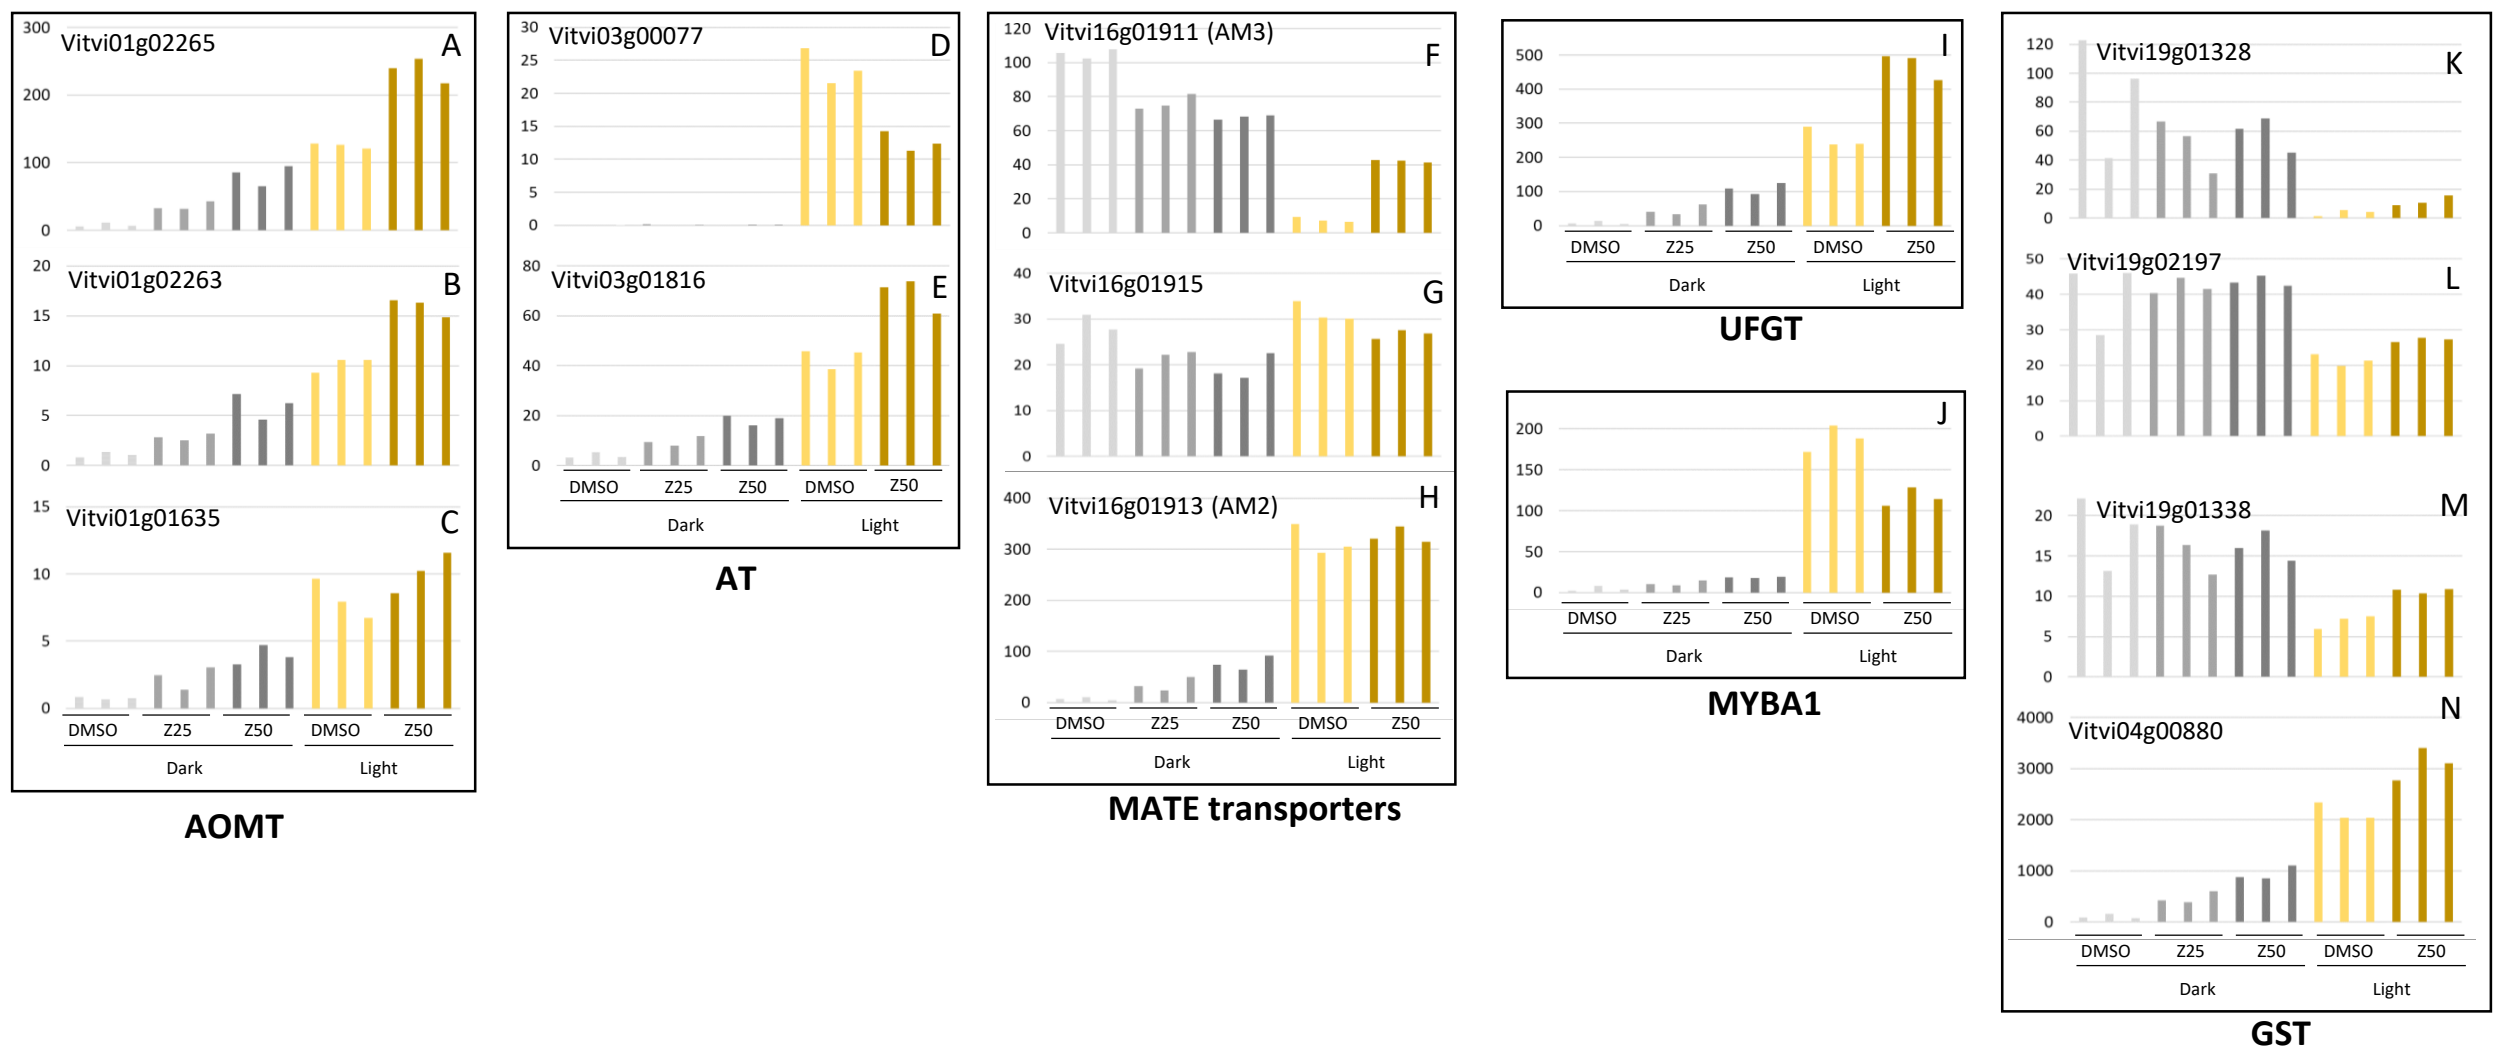

**Figure S7: RNA-seq results for a few selected anthocyanin-related genes.** The results are expressed in reads per kilo base per million mapped reads (rpkm). For each growth condition, three results are shown corresponding to three different biological replicates. For dark and light grown cells, different treatments were compared: DMSO, zebularine 25 $\mu$ M (Z25) or zebularine 50 $\mu$ M (Z50). **A.** AOMT - Vitvi01g02265; **B.** AOMT - Vitvi01g02263; **C.** AOMT - Vitvi01g01635; **D.** AT - Vitvi03g00077; **E.** AT - Vitvi03g01816; **F.** MATE transporter - Vitvi16g01911; **G.** MATE transporter - Vitvi16g01915; **H.** MATE transporter - Vitvi16g01913; **I.** UFGT - Vitvi16g00156; **J.** MYBA1. Vitvi02g01019; **K.** GST - Vitvi19g01328; **L.** GST - Vitvi19g02197; **M.** GST - Vitvi19g01338; **N.** GST - Vitvi04g00880. Vitvi01g02261 coding for an AOMT and Vitvi04g00884 coding for a GST were not included in this figure because their expression was respectively very low (< 2,5 rpkm in all samples) and undetectable in this study.

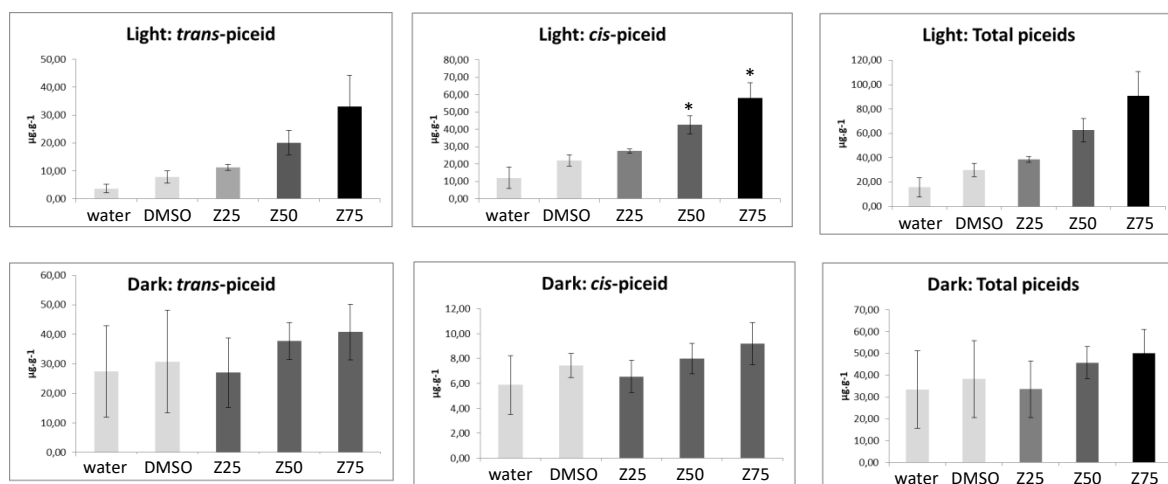

**Figure S8: Stilbene accumulation (µg g<sup>-1</sup> FW) in GT cell suspensions supplied with zebularine.** Values represent the mean +/- SD of triplicate assays. Welch t-test was used to analyze the difference between the means of zebularine-treated and DMSO-treated samples. One star (\*) was assigned to zebularine-treated samples when their polyphenol content differs significantly from the DMSO-treated samples (pvalues < 0.05). Resveratrol was detected in too low amounts to be precisely quantified.

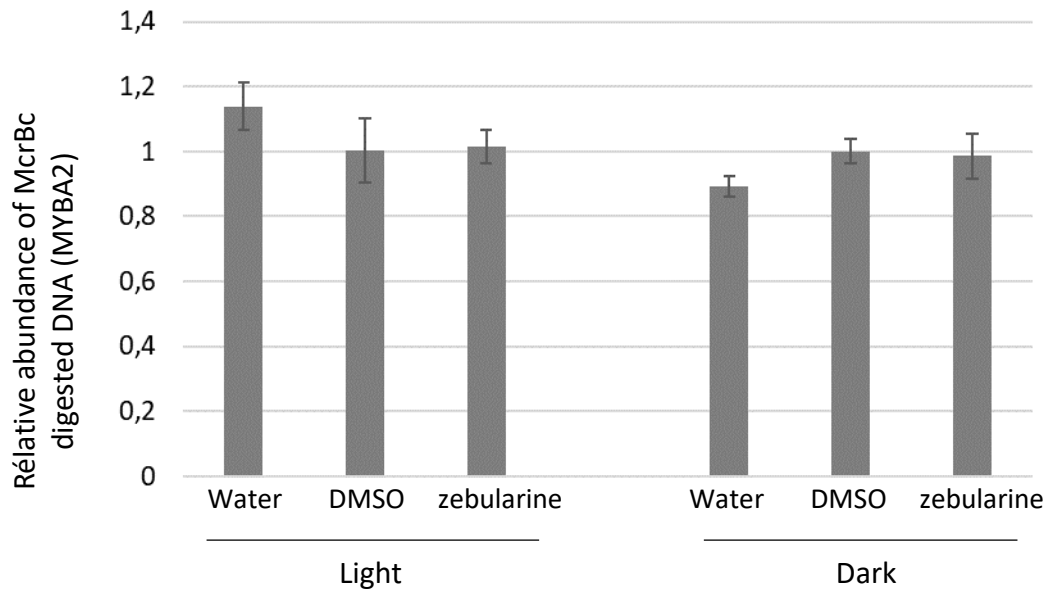

**Figure S9: No variation in DNA methylation was detected in the promoter of MYBA2 in zebularine-treated cells.** The methylation level was measured by McrBC-qPCR at a sequence located in MYBA2 5' region, 1200 bp upstream from the ATG. The relative abundances of the amplicons in the different McrBC-treated samples (normalization to ACTIN and to DMSO-treated samples) are shown. Bars represent the mean values for three to seven biological replicates with their standard deviations. Three biological replicates were used for all water- and DMSO-treated cells, five for the dark grown zebularine-treated cells (two replicates treated with 25 $\mu$ M, one with 50 $\mu$ M and one with 75 $\mu$ M), and seven for the light grown zebularine-treated cells (three replicates treated with 25 $\mu$ M, two with 50 $\mu$ M and two with 75 $\mu$ M).

**A**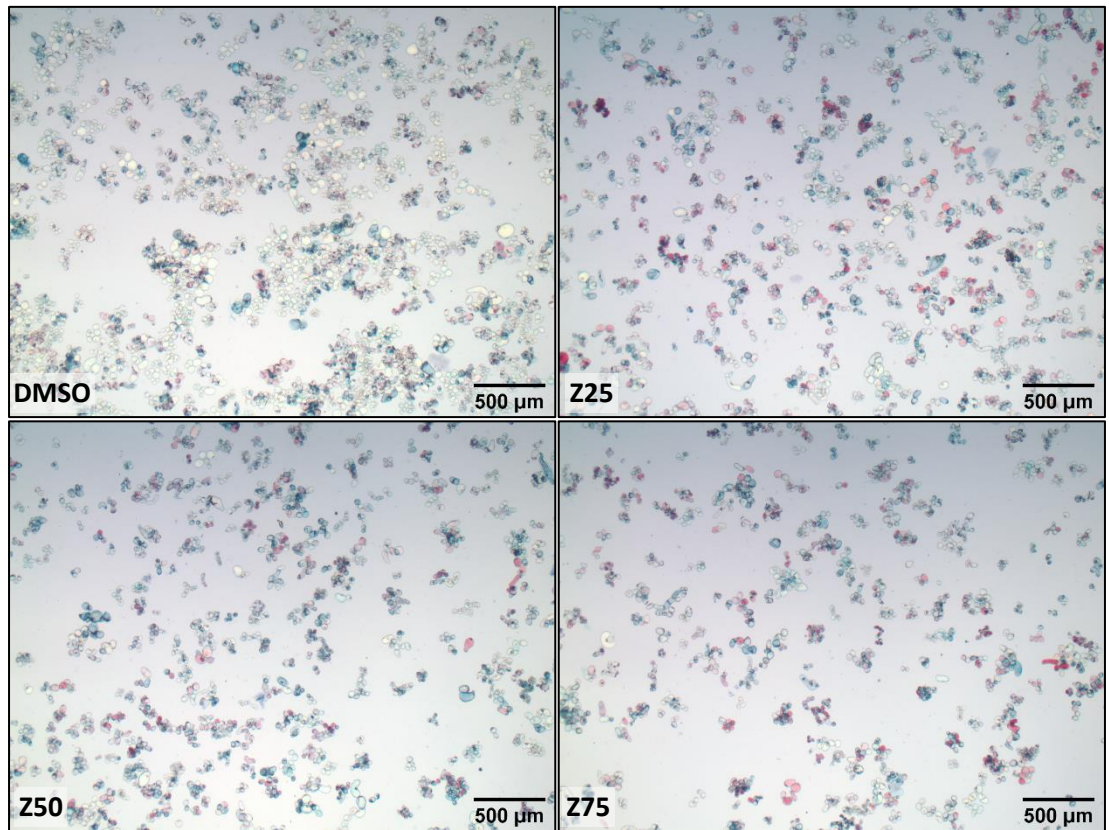**B**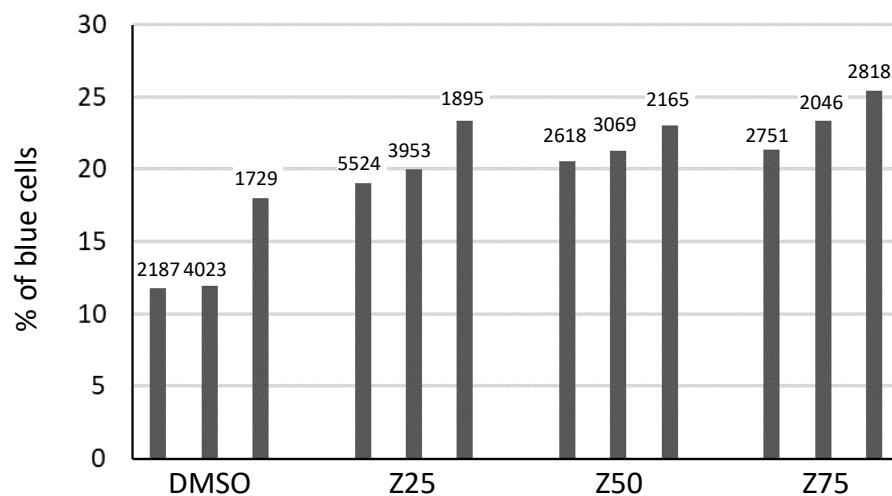

**Figure S10: Zebularine affects GT cell viability.** Cells were grown in the light. Treatments with zebularine were initiated 3 days after sub-culturing. Aliquots of different cell suspensions were collected 7 days after zebularine addition and observed by light microscope after trypan blue staining. **(A)** shows four representative pictures corresponding to the four different culture conditions. **(B)** The percentage of blue cells was quantified by manual counting, using 3 pictures corresponding to 3 biological replicates for each condition. The total number of cells counted for each analyses is indicated on top of the bars.

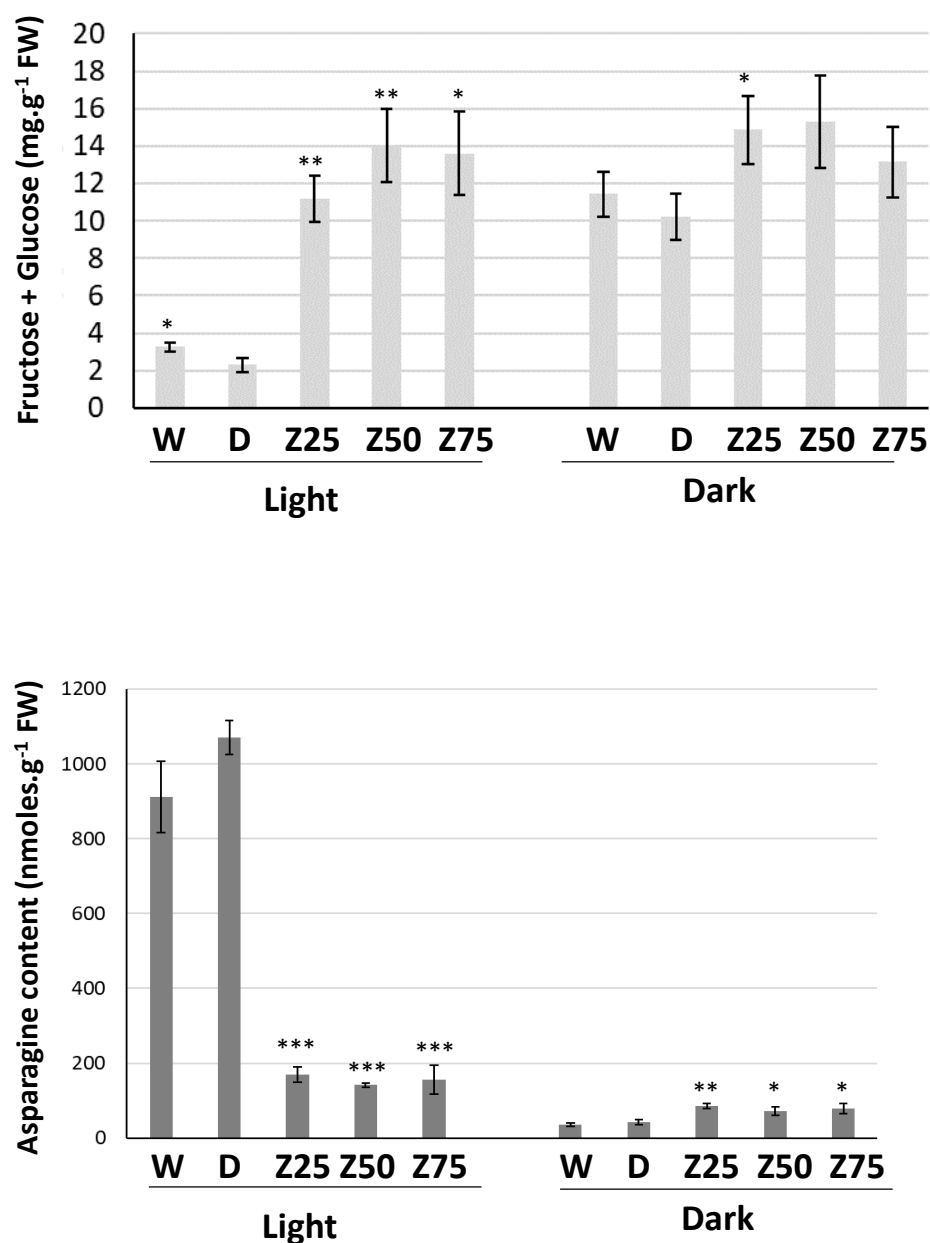

**Figure S11: Control (DMSO) light grown cells present hallmarks of carbon starvation, with very low sugar content (A) and important accumulation of asparagine (B).** Values are the mean  $\pm$  SD of three biological replicates. Asterisks indicate significant differences in the total amounts of glucose and fructose, as determined by a Welch's t-test ( $n = 3$ ) based on the mean differences between zebularine-treated and DMSO-treated samples (\* $P < 0.05$ ; \*\* $P < 0.01$ ; \*\*\* $P < 0.001$ ).

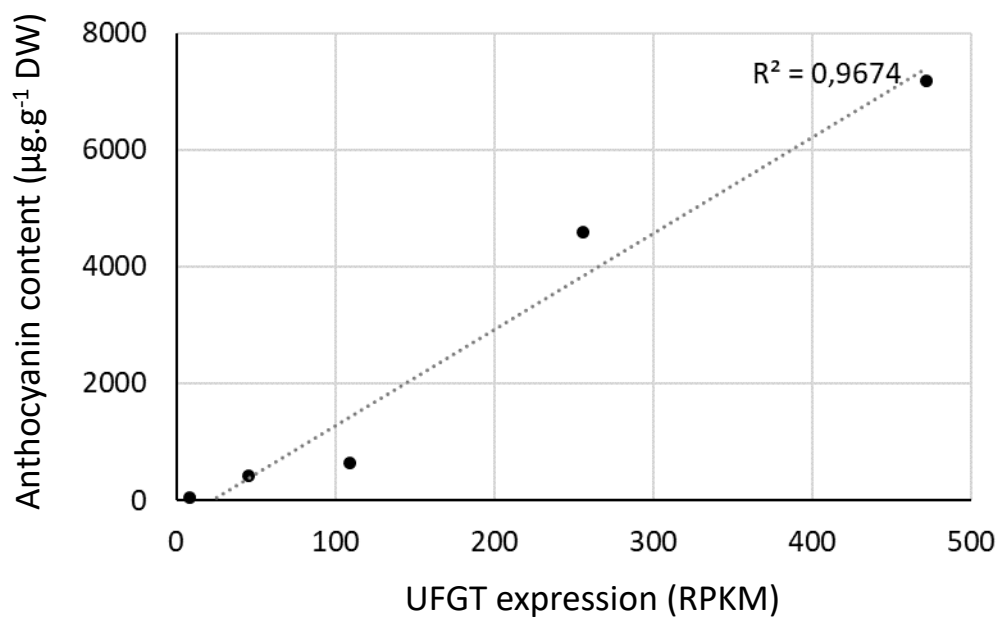

**Figure S12: The *UFGT* gene expression is highly correlated with anthocyanin content.**

The graph was constructed using the anthocyanin content and *UFGT* expression from 5 different growth conditions (DD, DZ25, DZ50, LD, LDZ50). For each condition, the mean of the three biological replicates were taken into account. *UFGT* expression was deduced from the RNA-seq experiment data shown in Figure S7. RPKM: Reads per kilo base per million mapped reads.
